# Supplementary material for: Annual net primary productivity of a cyanobacteria-dominated biological soil crust in the Gulf Savannah, Queensland, Australia
Source: Copernicus journal article supplement (doi:10.5194/bg-15-491-2018), 2018-01-26
Supplement: Supplementary file 1 [file bg-15-491-2018-supplement.pdf]

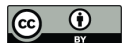

*Supplement of*

**Annual net primary productivity of a cyanobacteria-dominated biological soil crust in the Gulf Savannah, Queensland, Australia**

**Burkhard Büdel et al.**

*Correspondence to:* Burkhard Büdel ([buedel@bio.uni-kl.de](mailto:buedel@bio.uni-kl.de))

The copyright of individual parts of the supplement might differ from the CC BY 4.0 License.

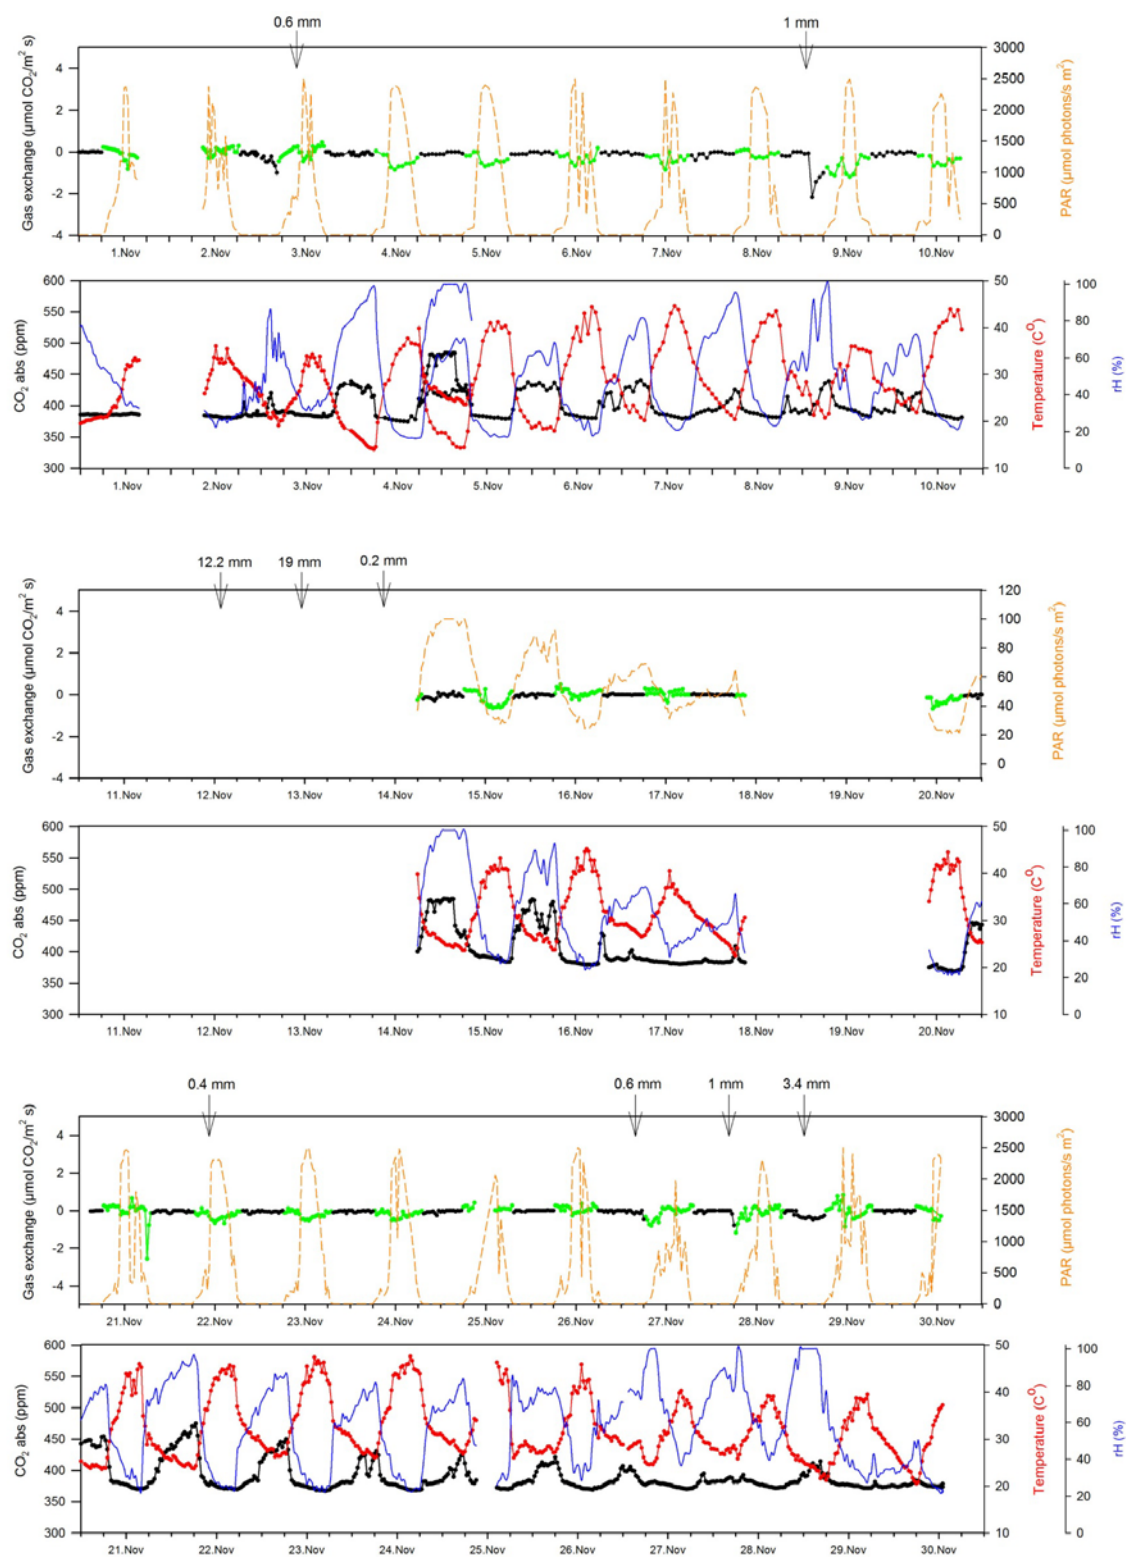

Figure S1

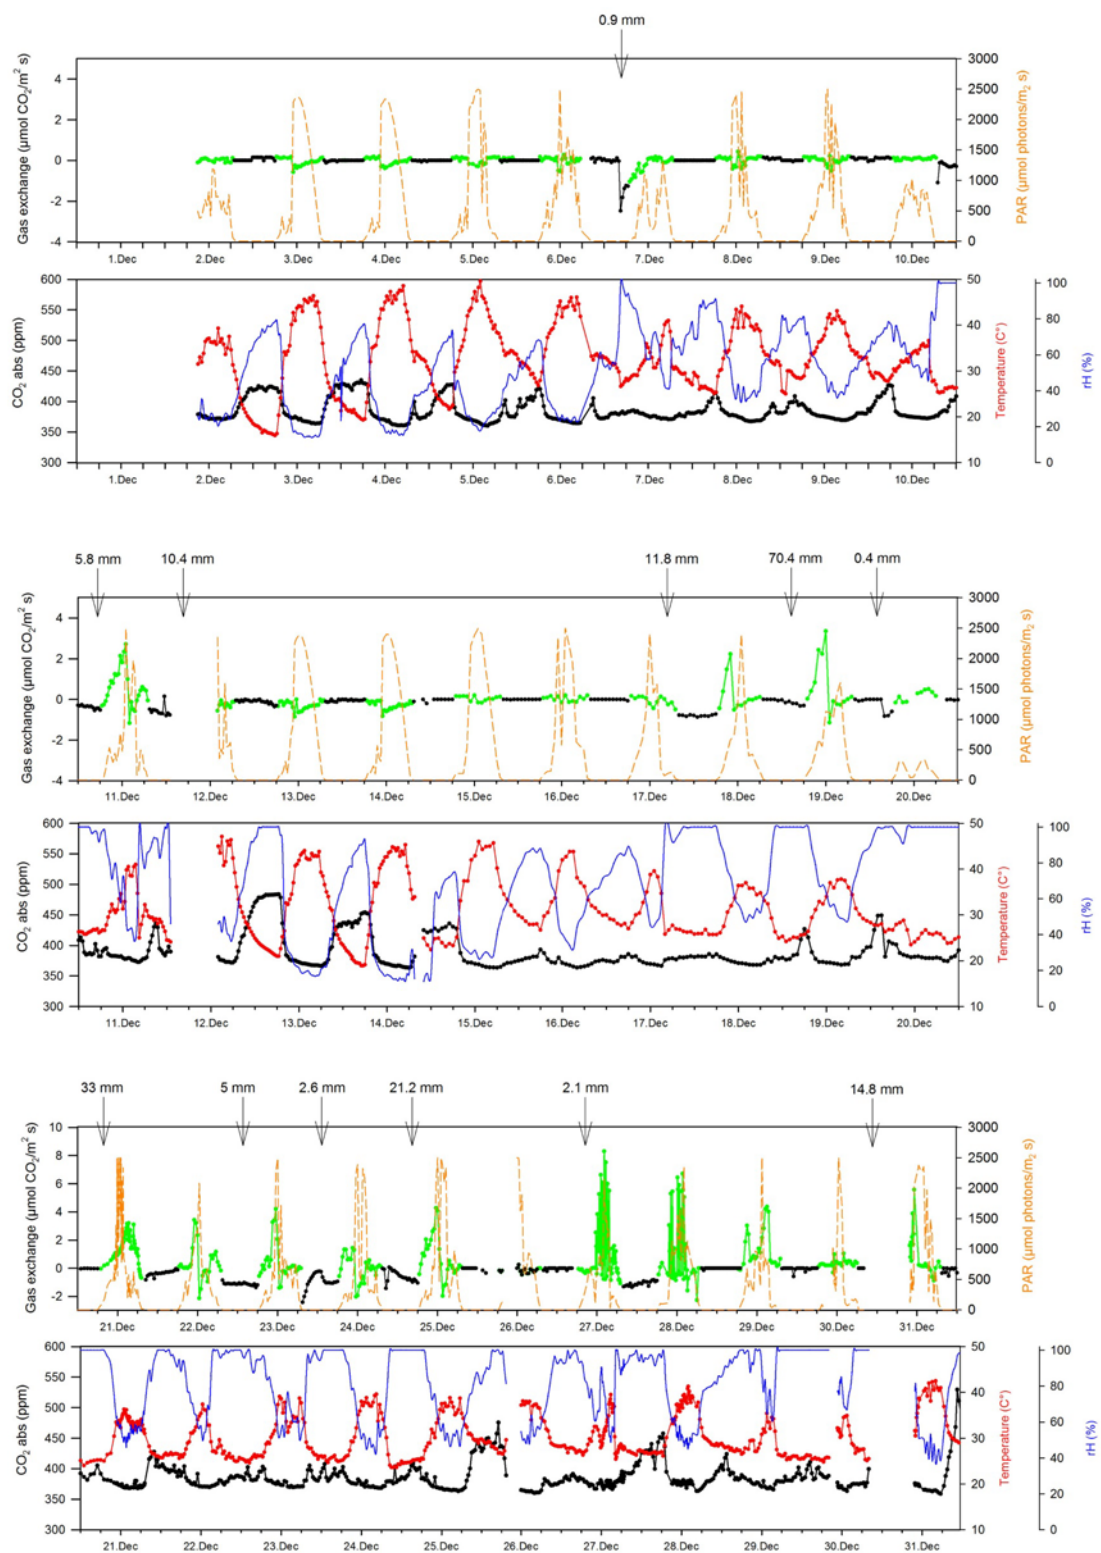

Figure S2

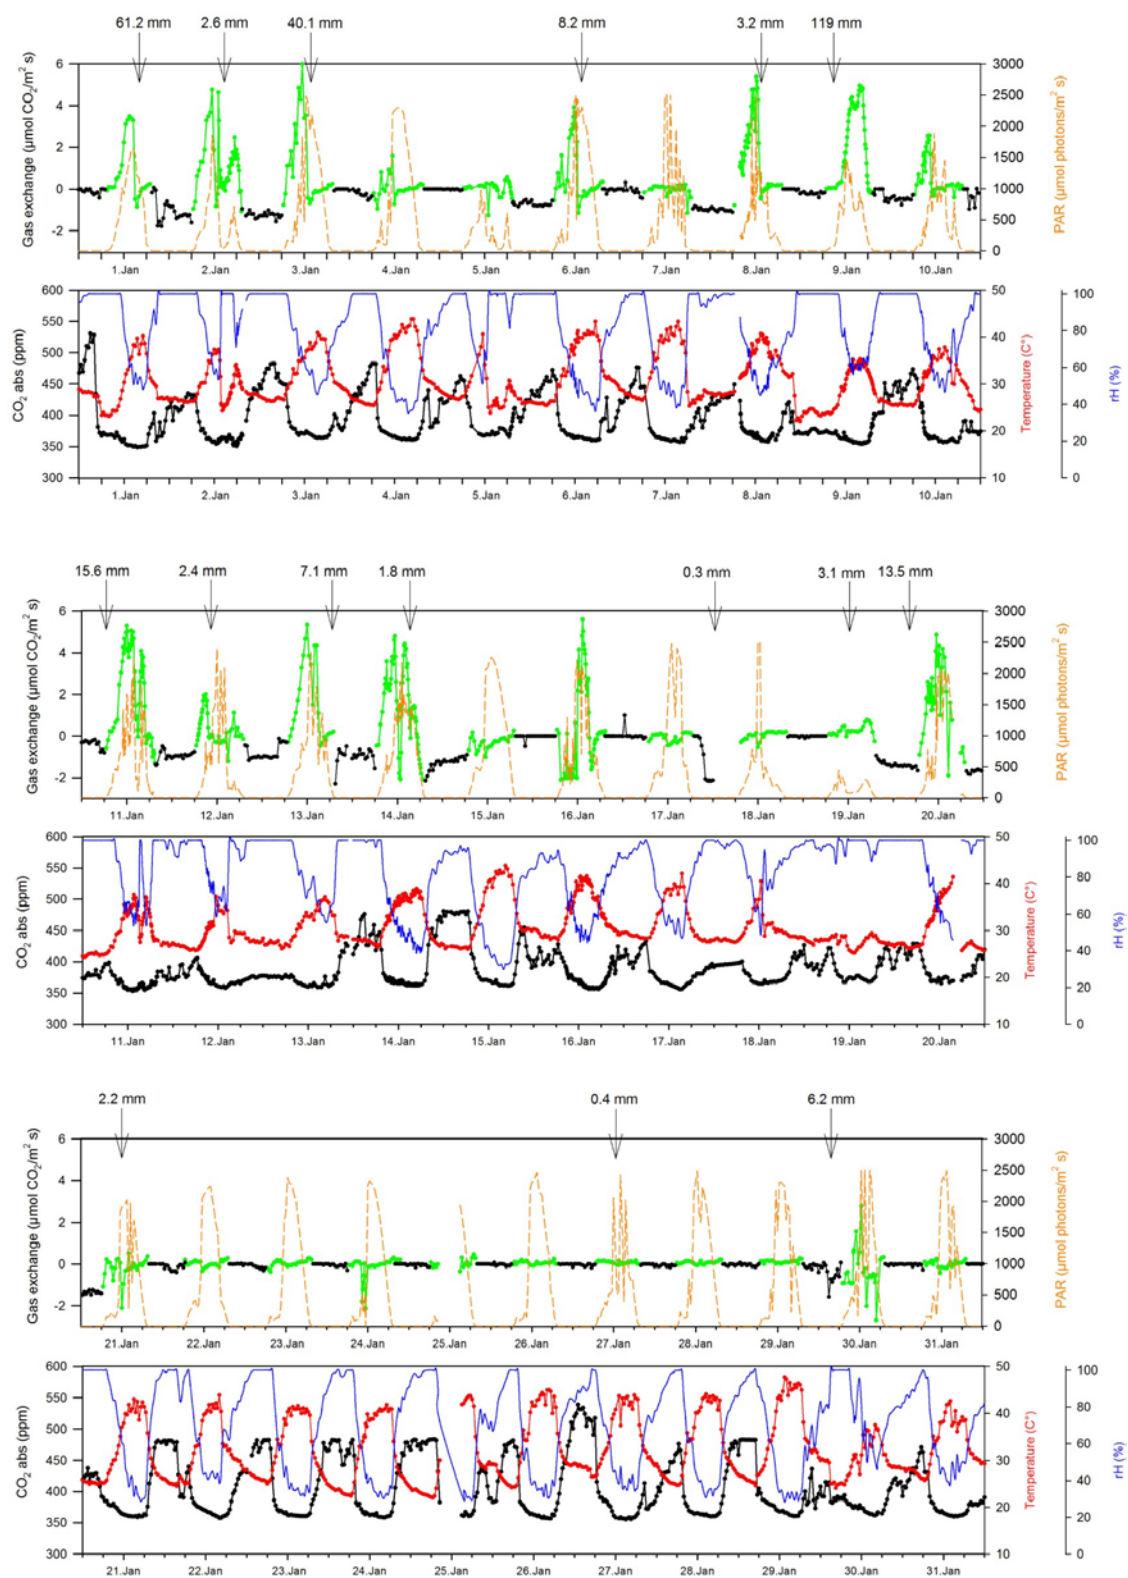

Figure S3



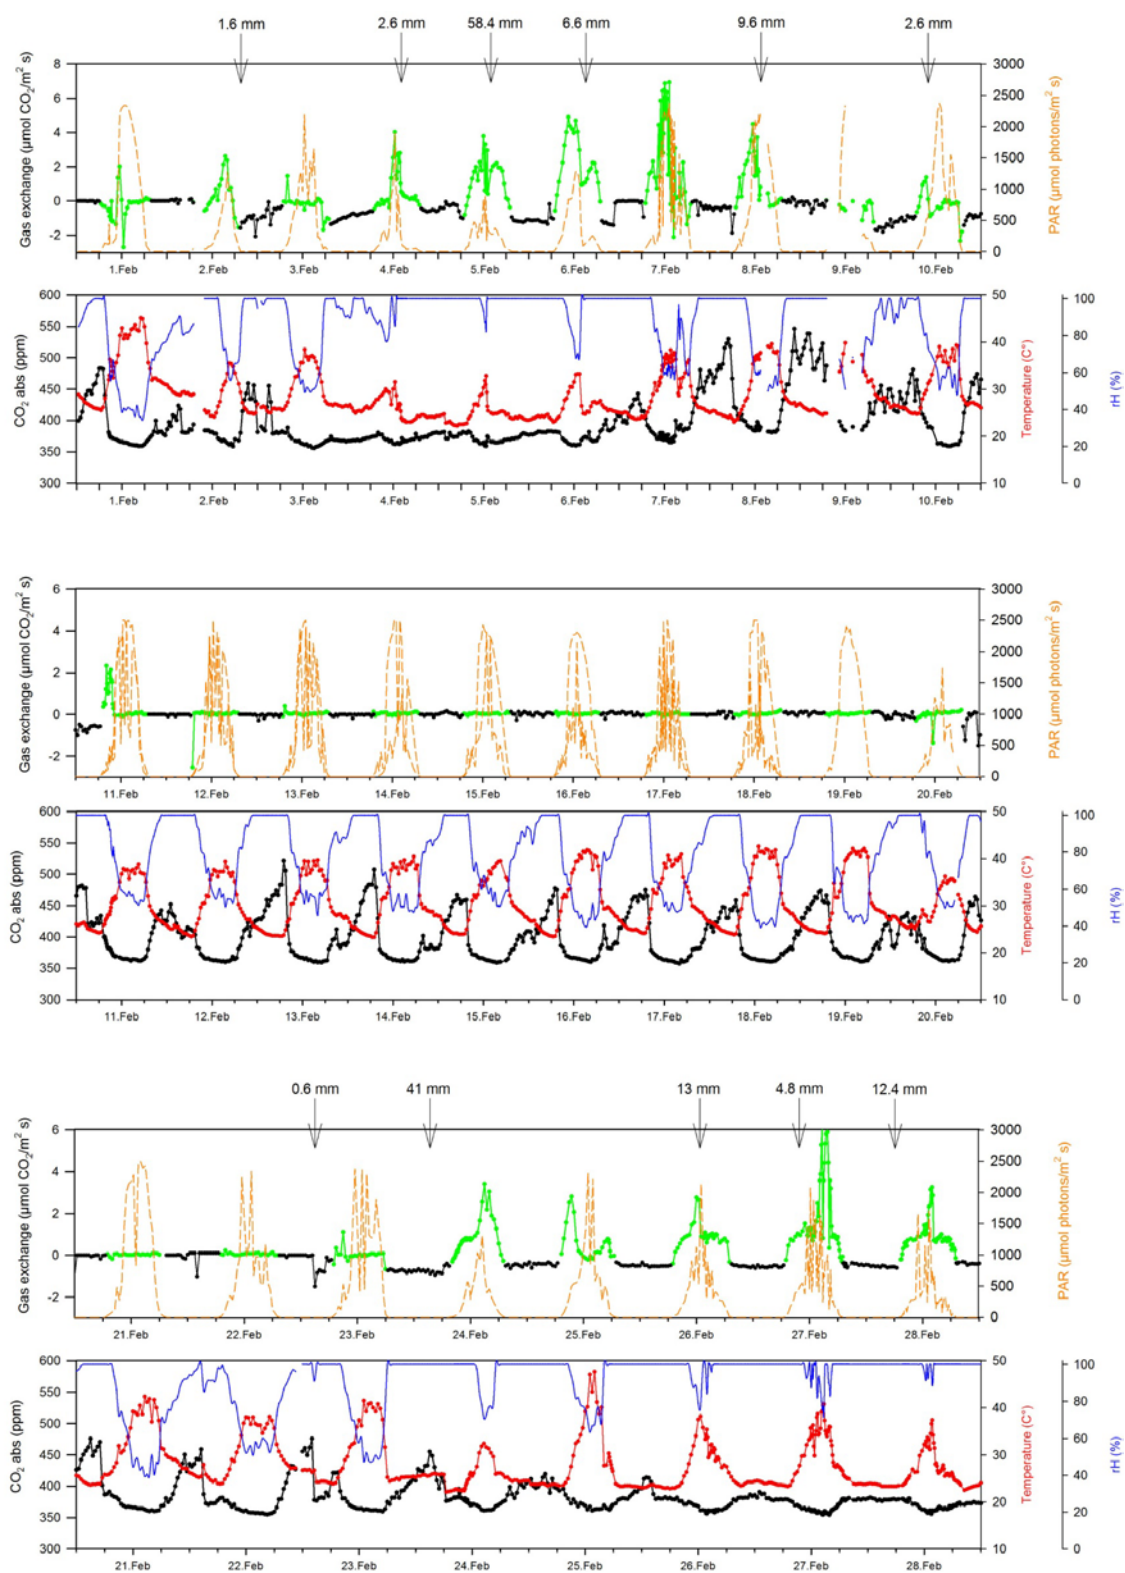

Figure S4

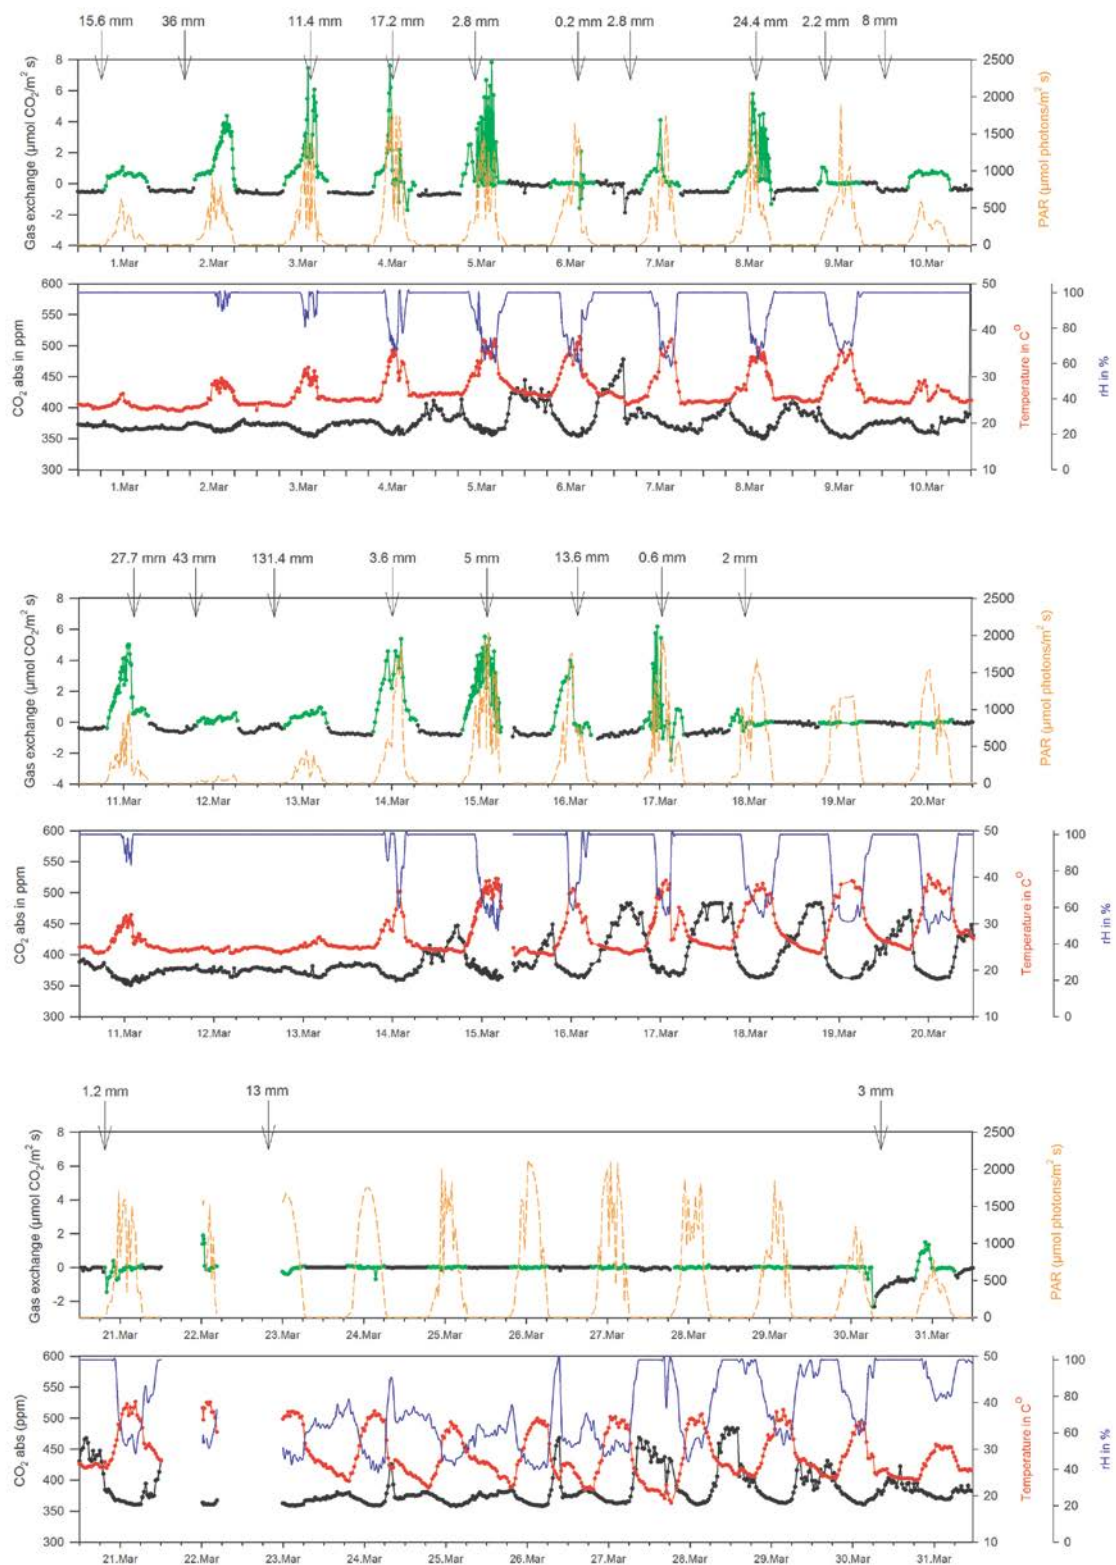

Figure S5

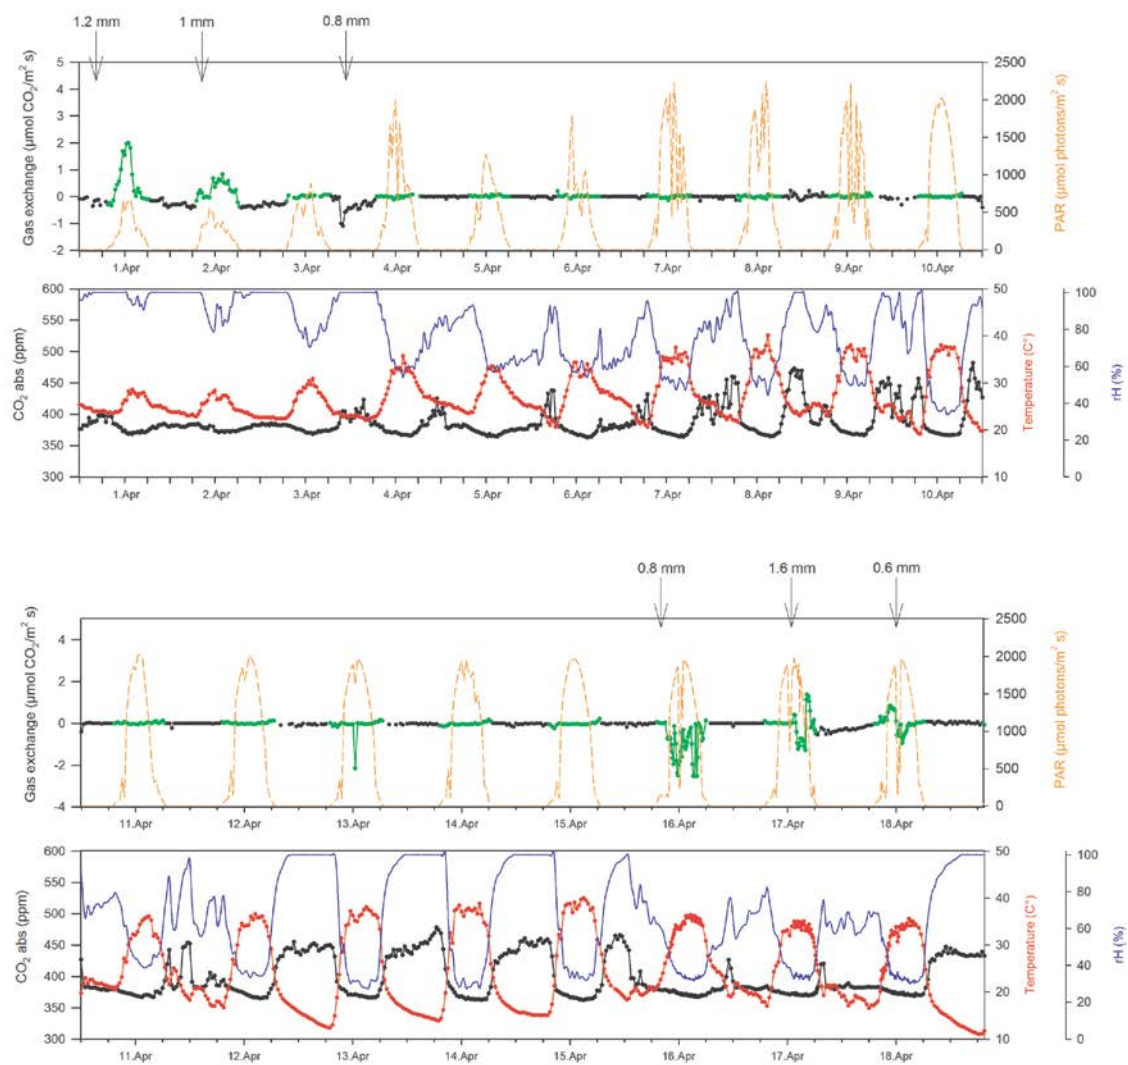

Figure S6
